# Supplementary material
Source: ML conference proceedings conference paper supplement (https://openreview.net/forum?id=pjTbFuv9ET)

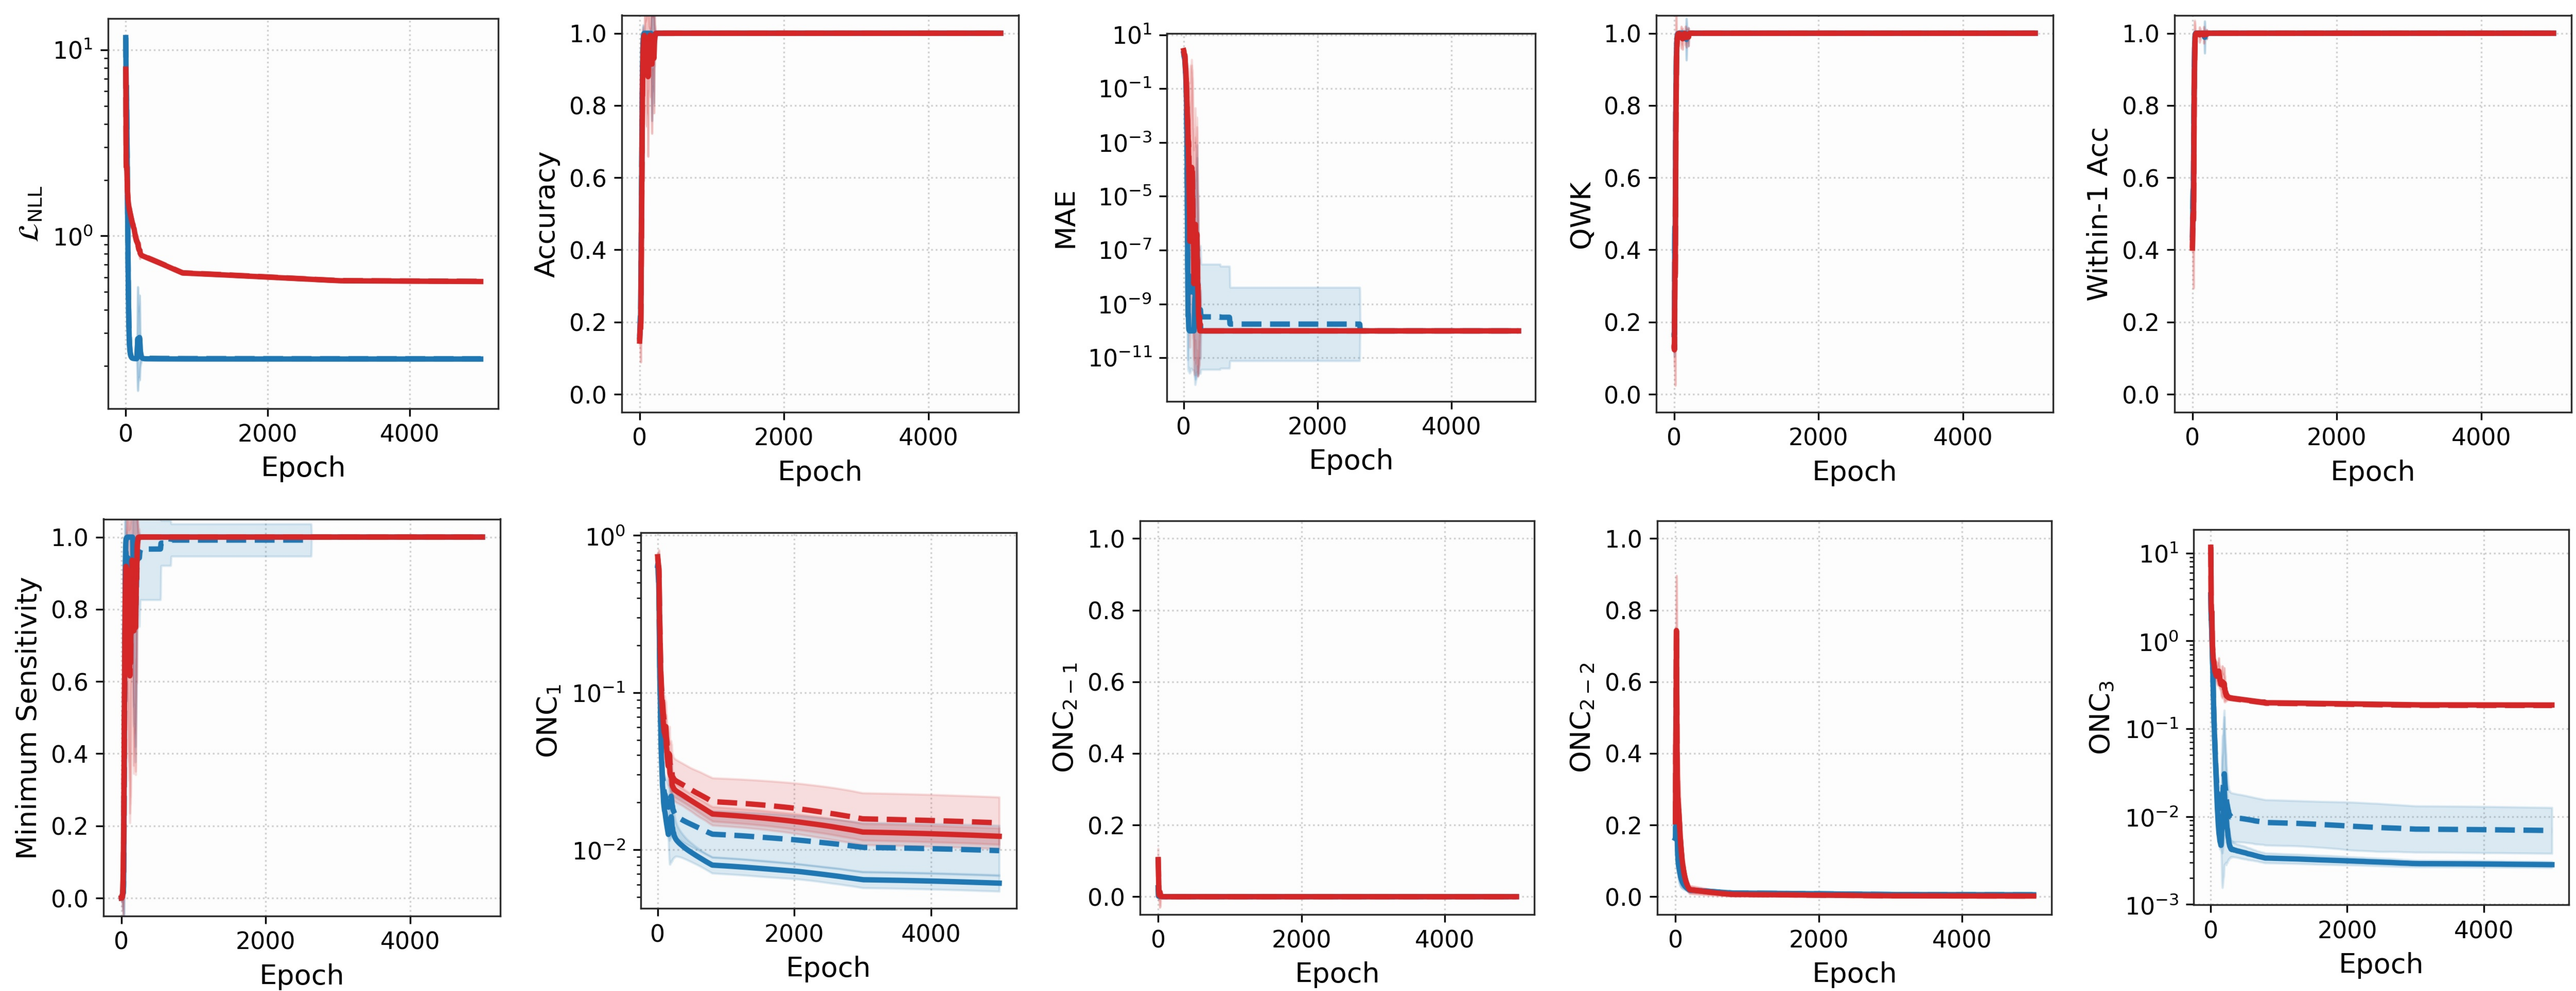

Supplement: supplementary_material [file metrics_curve_logit_ER.pdf › onc_experiments/experiment_metric_curve/vis/aggregated/ERA/logit/metrics_curve_logit_ER.pdf]
